# Supplementary material
Source: publisher figshare collection journal article supplement (https://tandf.figshare.com/ndownloader/files/22460627)
Supplement: Supplementary file 1 [file 22460627]

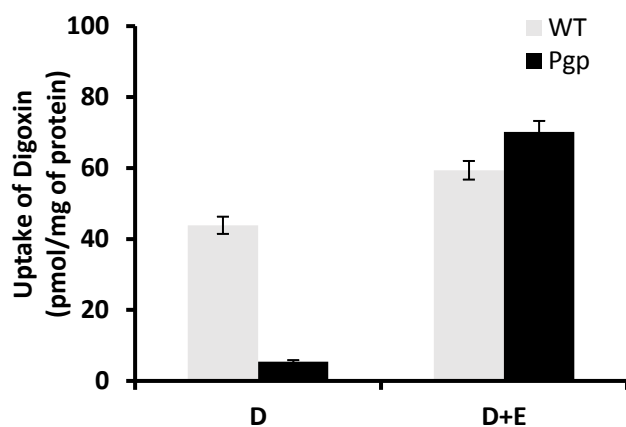

Figure 1s. Uptake of Digoxin (5  $\mu$ M) in LLC-PK-WT and LLC-PK-Pgp cells following 10 min preincubation with Elacridar (1  $\mu$ M). Where Digoxin is (D) and Elacridar is (E). Uptake ratio of Digoxin (8.10) in control conditions was reduced to 0.85 in the presence of Elacridar.

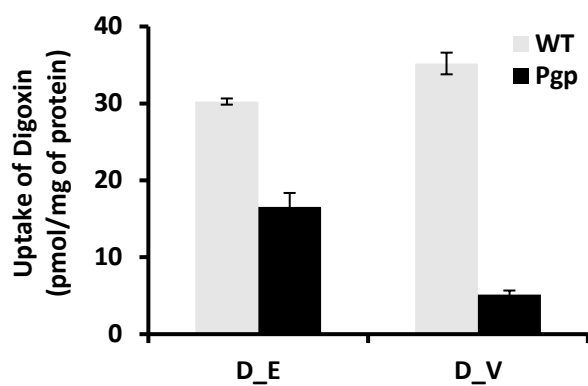

Figure 2s. Uptake of Digoxin (5  $\mu$ M) in LLC-PK-WT and LLC-PK-Pgp cells following 24 h preincubation with Elacridar (20  $\mu$ M) and Verapamil (100  $\mu$ M). Where Digoxin is (D), Elacridar is (E) and Verapamil is (V).

Table 1s. Transport of Digoxin and Quinidine across LLC-PK-WT and LLC-PK-Pgp transwell membrane in presence and absence of Elacridar.

| Cell Line    | Compounds             | $P_{app}$ (nm/sec) |      |      |      | ER   | ROR  |
|--------------|-----------------------|--------------------|------|------|------|------|------|
|              |                       | A-B                | SD   | B-A  | SD   |      |      |
| LLC-PK WT    | Digoxin               | 24.3               | 3.60 | 27.7 | 7.80 | 1.10 | -    |
|              | Digoxin + Elacridar   | 22.5               | 1.40 | 21.0 | 2.40 | 0.90 | -    |
|              | Quinidine             | 391                | 23.0 | 301  | 38.3 | 0.80 | -    |
|              | Quinidine + Elacridar | 30.9               | 3.10 | 1054 | 312  | 34.1 | -    |
| LLC-PK hP-gp | Digoxin               | 7.40               | 3.00 | 57.6 | 10.2 | 7.80 | 6.90 |
|              | Digoxin + Elacridar   | 18.1               | 2.70 | 29.5 | 5.60 | 1.60 | 1.70 |
|              | Quinidine             | 317                | 9.20 | 304  | 18.0 | 1.00 | 44.4 |
|              | Quinidine + Elacridar | 299                | 66.8 | 292  | 33.9 | 1.00 | 1.00 |
